# Supplementary material for: Transcriptomic Analysis of Gonadal Adipose Tissue in Male Mice Exposed Perinatally to 2,2&prime;,4,4&prime;-Tetrabromodiphenyl Ether (BDE-47)
Source: Preprints.org preprint supplement (doi:10.20944/preprints201803.0059.v1), 2018-03-08
Supplement: Supplementary file 1 [file supplementary]

## Sheet: Sheet1
Table S1: Significant 2-fold differentially expressed genes in gonadal adipose tissue of mice exposed perinatally to 0.2 mg/kg body weight BDE-47
Gene	Locus	log2(Control FPKM)	log2(BDE-47 FPKM)	log2(Ratio)	q Value
Kif27,Mir6369	chr13:58287515-58354862	-0.91	3.35	4.26	0.0221
Mir3061	chr11:52123633-52127767	-0.08	3.66	3.73	0.013
A330023F24Rik,Mir29b-2,Mir29c	chr1:195017157-195039001	1.51	4.66	3.15	0.013
Actg2	chr6:83512908-83536251	0.63	3.76	3.12	0.013
Mir17hg,Mir19b-1	chr14:115044304-115046851	0.54	2.85	2.3	0.0475
Cish	chr9:107296688-107301961	1.12	3.25	2.13	0.013
Sfrp2	chr3:83766320-83774314	2.38	4.48	2.1	0.013
Epc1,Mir1893	chr18:6435950-6516108	3.12	4.64	1.52	0.013
Grem2	chr1:174833784-174921819	1.78	3.29	1.51	0.013
Mir5122,Slc9a1	chr4:133369771-133423698	3.48	4.84	1.36	0.013
Axin2	chr11:108920348-108950785	2.8	4.09	1.29	0.013
Myh11	chr16:14194364-14291408	3.9	5.18	1.28	0.013
Tpm2	chr4:43513725-43523554	4.27	5.31	1.04	0.013
Mpeg1,Pfpl	chr19:12427904-12465285	5.76	4.7	-1.06	0.013
Cadm1	chr9:47530351-47853385	3.02	1.91	-1.11	0.0319
Ctsk	chr3:95499209-95509387	4.65	3.52	-1.13	0.013
Nceh1	chr3:27183003-27244911	3.33	2.2	-1.14	0.013
Apba3,Mir3057	chr10:81267855-81291581	4.83	3.67	-1.16	0.013
Mmp12	chr9:7347373-7360461	6.58	5.42	-1.16	0.013
Ccl9	chr11:83572916-83578636	5.58	4.4	-1.18	0.013
Trpv2	chr11:62574485-62600467	5.07	3.85	-1.23	0.013
Ccl6	chr11:83582060-83623693	7.45	6.21	-1.24	0.013
Cd300lb	chr11:114922778-114934386	4.04	2.8	-1.24	0.0475
Atf3	chr1:191170296-191183333	4.5	3.23	-1.28	0.013
Arhgap25	chr6:87458544-87533259	4.09	2.81	-1.28	0.0221
Ubd	chr17:37193891-37196101	6.15	4.87	-1.28	0.0475
Blnk	chr19:40928926-40994535	3.78	2.48	-1.3	0.0407
Bok	chr1:93685693-93695762	4.78	3.44	-1.34	0.0221
Cd300a	chr11:114890040-114906474	3.2	1.84	-1.36	0.013
Cd52	chr4:134093537-134095073	6.59	5.23	-1.36	0.013
Lgals3	chr14:47373859-47386167	8.2	6.83	-1.37	0.013
Thbs1	chr2:118111838-118127139	7.4	5.98	-1.41	0.013
Specc1	chr11:61956762-62223013	2.8	1.35	-1.44	0.013
Atp6v0d2	chr4:19876837-19922566	4.84	3.36	-1.48	0.013
C5ar1	chr7:16246742-16259540	4.54	3.05	-1.49	0.013
Lcn2	chr2:32384636-32387739	5.85	4.31	-1.54	0.013
Hmgcs2	chr3:98280430-98310738	5.12	3.58	-1.54	0.013
Rnf128	chrX:139563339-139673145	3.29	1.63	-1.67	0.0221
Mt2	chr8:94172617-94173567	9.84	8.12	-1.71	0.013
Slc38a3	chr9:107651154-107668968	3.49	1.78	-1.71	0.013
Ass1	chr2:31470269-31520670	4.33	2.5	-1.83	0.013
Mir6537,Pou2f2	chr7:25090634-25132462	2.71	0.65	-2.06	0.013
Acta1	chr8:123891757-123894775	6.91	4.84	-2.07	0.013
Itih4	chr14:30886475-30901986	2.33	0.07	-2.27	0.013
Itih3	chr14:30908573-30923587	1.9	-0.4	-2.3	0.013
Cuzd1	chr7:131308553-131322292	3.96	1.52	-2.44	0.013
Spp1	chr5:104435110-104441053	4.65	2.14	-2.51	0.013
Prom2	chr2:127526952-127541417	1.92	-0.6	-2.52	0.013
Ttr	chr18:20665249-20674326	4.93	2.27	-2.66	0.013
Hpd	chr5:123171806-123182686	3.06	0.35	-2.71	0.0221
Apoh	chr11:108395296-108414396	3.46	0.68	-2.79	0.013
Gnmt	chr17:46725663-46729165	3.28	0.45	-2.83	0.013
Hpx	chr7:105591610-105600116	4.13	1.25	-2.88	0.013
Fabp1	chr6:71199887-71205023	6.41	3.49	-2.93	0.013
Mug1,Mug2	chr6:121781824-122085967	2.92	-0.08	-3	0.0221
Cyp2c29,Cyp2c39	chr19:39287084-39568529	2.85	-0.29	-3.14	0.013
Cyp2c70	chr19:40153360-40187286	2.9	-0.35	-3.24	0.013
Itih2	chr2:10094590-10130683	1.93	-1.37	-3.3	0.013
Apoa1	chr9:46228629-46230469	6.07	2.63	-3.44	0.013
Arg1	chr10:24915206-24927470	2.95	-0.51	-3.46	0.013
Kng1	chr16:23058299-23082078	2.93	-0.55	-3.48	0.013
Aldob	chr4:49535994-49549483	3.72	0.23	-3.49	0.013
Ambp	chr4:63143278-63154142	3.8	0.31	-3.49	0.013
Pah	chr10:87521794-87584137	1.65	-1.88	-3.53	0.013
Slco1b2	chr6:141629517-141686635	1.24	-2.35	-3.59	0.0475
Rdh7	chr10:127884026-127888733	2.05	-1.58	-3.63	0.013
Apof	chr10:128267996-128270151	1.7	-1.94	-3.64	0.0475
Gc	chr5:89417510-89457898	4.75	1.08	-3.67	0.013
Itih1	chr14:30929179-30943289	1	-2.71	-3.71	0.0319
Azgp1	chr5:137981520-137990232	2.32	-1.41	-3.73	0.0475
Akr1c6	chr13:4434342-4457530	2.87	-0.87	-3.74	0.0475
Bhmt	chr13:93616890-93637758	3.96	0.17	-3.79	0.013
Alb	chr5:90460888-90476603	8.5	4.62	-3.88	0.013
Cyp3a11,Cyp3a41a	chr5:145694048-145879854	4.16	0.27	-3.89	0.013
Pzp	chr6:128438756-128526720	2.79	-1.11	-3.9	0.013
Plg	chr17:12378608-12419384	3.05	-0.87	-3.92	0.013
Rgn	chrX:20549817-20562087	2.67	-1.29	-3.96	0.013
Fgg	chr3:83007895-83015049	4.71	0.74	-3.97	0.013
Fgb	chr3:83042304-83049790	4.87	0.88	-3.99	0.013
F2	chr2:91625319-91636457	2.86	-1.16	-4.02	0.013
Gjb1	chrX:101376375-101385629	1.99	-2.12	-4.11	0.0407
Apob	chr12:7977676-8016839	1.88	-2.46	-4.34	0.013
Dio3os,Mir1247	chr12:110275384-110278656	4.86	0.42	-4.43	0.013
Fga	chr3:83026152-83033617	4.17	-0.42	-4.59	0.013
Cps1	chr1:67123026-67231267	2.66	-1.94	-4.6	0.013
Mat1a	chr14:41105032-41124428	2.96	-1.67	-4.62	0.013
Spint4	chr2:164698500-164702448	0.01	-10	-10.01	0.0221
Defb43	chr14:63011770-63018088	0.35	-10	-10.35	0.013
Bsph2	chr7:13554865-13571067	0.43	-10	-10.43	0.013
Rnase12	chr14:51056697-51057242	0.84	-10	-10.84	0.013
Defb37	chr8:18986232-18991055	1.5	-10	-11.5	0.013
AY761185	chr8:20943693-20944748	2.11	-10	-12.11	0.013
Defb28	chr2:152518254-152521447	3.29	-10	-13.29	0.013
Defb38	chr8:19023463-19026529	3.44	-10	-13.44	0.0221
