# Supplementary material for: Transcriptomic Analysis of Gonadal Adipose Tissue in Male Mice Exposed Perinatally to 2,2&prime;,4,4&prime;-Tetrabromodiphenyl Ether (BDE-47)
Source: Preprints.org preprint supplement (doi:10.20944/preprints201803.0059.v1), 2018-03-08
Supplement: Supplementary file 3 [file Table S2.xlsx]

## Sheet: Sheet1
Table S2: GSEA analysis: summary of top enriched gene sets in the gonadal adipose tissue of mice exposed perinatally to 0.2 mg/kg body weight BDE-47
NAME	SIZE	Enrichment score	Normalised enrichment score	NOM p-val	FDR q-val	FWER p-val	RANK AT MAX
HALLMARK_COAGULATION	108	-0.792536	-1.78127	0	0.00410128	0.004	582
HALLMARK_XENOBIOTIC_METABOLISM	167	-0.726912	-1.67502	0	0.0278058	0.055	446
HALLMARK_BILE_ACID_METABOLISM	87	-0.720791	-1.57108	0.00357143	0.0984456	0.256	366
HALLMARK_COMPLEMENT	143	-0.605375	-1.37653	0.0503432	0.676868	0.942	2331
REACTOME_SMOOTH_MUSCLE_CONTRACTION	20	0.757134	1.90847	0.06639	1	1	253
MEINHOLD_OVARIAN_CANCER_LOW_GRADE_UP	16	0.73234	1.72029	0.106529	1	1	31
HORTON_SREBF_TARGETS	20	0.725417	1.71812	0.092511	1	1	1471
REACTOME_MUSCLE_CONTRACTION	30	0.675135	1.61085	0.108808	1	1	456
NADLER_OBESITY_DN	44	0.669543	1.52608	0.0617284	1	1	1884
REACTOME_CHOLESTEROL_BIOSYNTHESIS	18	0.645741	1.52232	0.143911	1	1	1672
HSIAO_LIVER_SPECIFIC_GENES	172	-0.883853	-2.02835	0	0	0	488
CAIRO_LIVER_DEVELOPMENT_DN	172	-0.82345	-1.92665	0	0	0	673
SU_LIVER	38	-0.928119	-1.92056	0	0	0	429
CHIANG_LIVER_CANCER_SUBCLASS_PROLIFERATION_DN	129	-0.845769	-1.89659	0	0.00178029	0.007	429
OHGUCHI_LIVER_HNF4A_TARGETS_DN	82	-0.838354	-1.8692	0	0.0051027	0.025	968
YAMASHITA_LIVER_CANCER_STEM_CELL_DN	49	-0.860705	-1.85567	0	0.00884171	0.051	404
KEGG_COMPLEMENT_AND_COAGULATION_CASCADES	47	-0.850205	-1.82079	0	0.0367081	0.23	480
LEE_LIVER_CANCER_SURVIVAL_UP	118	-0.806319	-1.81922	0	0.0345453	0.243	446
HOSHIDA_LIVER_CANCER_SUBCLASS_S3	209	-0.772904	-1.80562	0	0.0566491	0.399	643
BIOCARTA_INTRINSIC_PATHWAY	20	-0.899086	-1.80015	0.00266312	0.0631242	0.471	446
REACTOME_FORMATION_OF_FIBRIN_CLOT_CLOTTING_CASCADE	22	-0.895886	-1.79392	0	0.070832	0.548	480
KONDO_PROSTATE_CANCER_WITH_H3K27ME3	47	-0.826703	-1.78268	0.00117925	0.0929759	0.673	682
SERVITJA_ISLET_HNF1A_TARGETS_DN	64	-0.824487	-1.776	0	0.107639	0.758	673
LEE_LIVER_CANCER_CIPROFIBRATE_DN	34	-0.84276	-1.75446	0.00490798	0.191406	0.924	550
LEE_LIVER_CANCER	30	-0.861457	-1.74869	0.00128205	0.208157	0.948	397
GO_BLOOD_MICROPARTICLE	71	-0.860268	-1.89513	0	0.0100744	0.01	272
GO_ACUTE_PHASE_RESPONSE	24	-0.897194	-1.84715	0	0.0545102	0.101	335
GO_SERINE_TYPE_ENDOPEPTIDASE_INHIBITOR_ACTIVITY	46	-0.842975	-1.82444	0	0.105	0.264	242
GO_LIPOPROTEIN_PARTICLE_RECEPTOR_BINDING	16	-0.926117	-1.81416	0	0.115658	0.371	272
GO_POSITIVE_REGULATION_OF_COAGULATION	24	-0.883614	-1.81389	0.00129702	0.0929311	0.373	480
GO_ACUTE_INFLAMMATORY_RESPONSE	41	-0.844239	-1.80654	0	0.104209	0.467	457
GO_REGULATION_OF_COAGULATION	74	-0.812759	-1.78523	0	0.188057	0.728	786
GO_BLOOD_COAGULATION_FIBRIN_CLOT_FORMATION	18	-0.909353	-1.77767	0	0.210428	0.81	480
GO_NEGATIVE_REGULATION_OF_COAGULATION	42	-0.84488	-1.77383	0.00124378	0.211958	0.848	233
